# Supplementary material for: LncRNAs regulate the cyclic growth and development of hair follicles in Dorper sheep
Source: Front Vet Sci. 2023 Jul 31;10:1186294. doi: 10.3389/fvets.2023.1186294 (PMC10423938; doi:10.3389/fvets.2023.1186294)
Supplement: SUPPLEMENTARY TABLE S1 — The lncRNA-target gene pairs screened by three target gene prediction methods. [file Table_1.XLSX]

## Sheet: Sheet1
trans						cis					antisense
lncRNA ID	Gene ID	cor	Symbol	p-value	description	lncRNA ID	Gene ID	cor	target gene	description	lncRNA ID	Gene ID	cor	target gene	description
MSTRG.1561.1	ncbi_101103772	0.98478	KRTAP11-1	3.26163e-18	keratin-associated protein 11-1	MSTRG.23001.1	ncbi_443414	0.978971	--	KAP5.4 keratin protein	MSTRG.1561.1	ncbi_101103772	0.98478	KRTAP11-1	keratin-associated protein 11-1
MSTRG.13836.1	ncbi_443080	0.981706	KRT28	2.43189e-17	keratin 28	MSTRG.13824.1	ncbi_101111893	0.9767	KRTAP3-3	keratin, high sulfur matrix protein, IIIB3	MSTRG.13836.1	ncbi_443080	0.981706	KRT28	keratin 28
MSTRG.23001.1	ncbi_443414	0.978971	--	1.11174e-16	KAP5.4 keratin protein	MSTRG.22035.1	ncbi_101123158	0.968265	Hist1h1b	histone H1.5	MSTRG.13826.1	ncbi_443550	0.961944	KRTAP3-3	high-sulfur keratin BIIIB4 protein
MSTRG.17912.2	MSTRG.17912	0.978232	ZNF792	1.6206e-16	endonuclease-reverse transcriptase [Babesia ovata]	MSTRG.22035.1	ncbi_101102344	0.964409	HIST1H2AG	histone H2A type 1	MSTRG.25305.1	ncbi_101121145	0.956587	CXCL12	C-X-C motif chemokine ligand 12, transcript variant X2
MSTRG.13824.1	ncbi_101111893	0.9767	KRTAP3-3	3.39952e-16	keratin, high sulfur matrix protein, IIIB3	MSTRG.22048.1	ncbi_114109701	0.958871	H3110	histone H3.1, transcript variant X2	MSTRG.22029.1	ncbi_106990414	0.949329	H3110	histone H3.1
MSTRG.23001.1	ncbi_101123344	0.975739	VSIG8	5.27988e-16	V-set and immunoglobulin domain containing 8	MSTRG.13237.1	MSTRG.13236	0.952877	--	reverse transcriptase-like [Bos taurus]	MSTRG.13826.1	ncbi_101111893	0.948238	KRTAP3-3	keratin, high sulfur matrix protein, IIIB3
MSTRG.12818.1	ncbi_101114118	0.97368	Lpar6	1.28115e-15	lysophosphatidic acid receptor 6	MSTRG.22029.1	ncbi_101102344	0.949764	HIST1H2AG	histone H2A type 1	MSTRG.22048.1	ncbi_101108868	0.938365	H3110	uncharacterized LOC101108868
MSTRG.22048.1	ncbi_106991790	0.973591	H3110	1.32927e-15	uncharacterized LOC106991790	MSTRG.22029.1	ncbi_101123158	0.948466	Hist1h1b	histone H1.5	MSTRG.22035.1	ncbi_101119679	0.931205	Hist1h2bc	histone H2B type 1
MSTRG.23001.1	ncbi_114116970	0.97321	--	1.55332e-15	keratin-associated protein 17-1	MSTRG.22029.1	ncbi_101119941	0.944258	Hist1h2bc	histone H2B type 1	MSTRG.13820.1	ncbi_114116854	0.928948	--	keratin, high-sulfur matrix protein, IIIA3A
MSTRG.13824.1	ncbi_101103772	0.970838	KRTAP11-1	3.90512e-15	keratin-associated protein 11-1	MSTRG.22029.1	ncbi_101120200	0.932616	HIST1H2AG	histone H2A type 1, transcript variant X1	MSTRG.5354.1	ncbi_101108204	0.925705	ANTXR1	ANTXR cell adhesion molecule 1
MSTRG.22035.1	ncbi_101119941	0.970156	Hist1h2bc	5.02054e-15	histone H2B type 1	MSTRG.22029.1	ncbi_101119679	0.927978	Hist1h2bc	histone H2B type 1	MSTRG.1612.2	ncbi_101106296	0.892521	KRTAP27-1	keratin-associated protein 27-1
MSTRG.15931.1	ncbi_101109113	0.969892	DIP2C	5.52563e-15	disco interacting protein 2 homolog C, transcript variant X1	MSTRG.13836.1	ncbi_100141298	0.920925	KRT27	keratin 27	MSTRG.25354.1	MSTRG.25353	0.889398	DEFB1	PREDICTED: beta-defensin 1 [Odobenus rosmarus divergens]
MSTRG.1616.1	ncbi_101123344	0.969697	VSIG8	5.92509e-15	V-set and immunoglobulin domain containing 8	MSTRG.6192.1	ncbi_101112805	0.916176	KRT83	keratin, type II cuticular Hb5-like	MSTRG.22029.1	ncbi_101120961	0.885528	H3110	uncharacterized LOC101120961
MSTRG.22048.1	ncbi_101110457	0.968617	Hist1h2bc	8.66702e-15	histone H2B type 1	MSTRG.13808.2	ncbi_105611408	0.91555	KRTAP29-1	keratin associated like protein 29-1	MSTRG.13951.1	ncbi_114116975	0.883973	SP6	Sp6 transcription factor
MSTRG.22035.1	ncbi_101123158	0.968265	Hist1h1b	9.78213e-15	histone H1.5	MSTRG.2562.1	ncbi_101102526	0.878407	KRTAP10-6	keratin-associated protein 10-12-like	MSTRG.5008.1	ncbi_101108737	0.86613	DNM1	dynamin 1, transcript variant X1
MSTRG.49.1	ncbi_101112842	0.968076	Capn12	1.04349e-14	calpain-12	MSTRG.13808.2	ncbi_114116970	0.866508	--	keratin-associated protein 17-1	MSTRG.1616.1	ncbi_101116882	0.860397	KRTAP24-1	keratin-associated protein 24-1
MSTRG.22035.1	ncbi_106991790	0.967855	H3110	1.12465e-14	uncharacterized LOC106991790	MSTRG.13820.1	ncbi_100294613	0.829965	KRTAP1-5	keratin associated protein 1-3	MSTRG.22035.1	ncbi_101119426	0.841539	Hist1h2bc	histone H2B type 1
MSTRG.23796.1	ncbi_101115537	0.967501	Pip5k1c	1.26627e-14	phosphatidylinositol-4-phosphate 5-kinase type 1 gamma, transcript variant X1	MSTRG.6192.1	ncbi_100526780	0.822609	KRT83	keratin 83	MSTRG.13805.6	ncbi_114116970	0.829696	--	keratin-associated protein 17-1
MSTRG.1595.1	ncbi_101104027	0.966868	KRTAP7-1	1.56108e-14	keratin-associated protein 7-1-like	MSTRG.13826.1	ncbi_100526785	0.800581	KRT40	keratin 40	MSTRG.13820.1	ncbi_105610157	0.802935	--	keratin, high-sulfur matrix protein, IIIA3A
MSTRG.15931.1	ncbi_101113985	0.966649	DAPK1	1.67661e-14	death associated protein kinase 1, transcript variant X2	XR_003590955.1	ncbi_101120004	0.796858	PRDM16	PR/SET domain 16, transcript variant X1	MSTRG.17107.1	ncbi_114117806	0.789114	CH1	major allergen I polypeptide chain 1-like
MSTRG.13836.1	ncbi_101115868	0.966586	Gmcl1	1.71151e-14	germ cell-less 1, spermatogenesis associated	MSTRG.5175.1	ncbi_101122507	0.758992	FAM49A	family with sequence similarity 49 member A, transcript variant X1	XR_003591812.1	ncbi_101120439	0.759344	SLC43A1	solute carrier family 43 member 1, transcript variant X1
MSTRG.13836.1	ncbi_101105594	0.966282	CCDC155	1.88795e-14	coiled-coil domain containing 155, transcript variant X2	XR_003587176.1	ncbi_101105052	0.710637	RBPMS	RNA binding protein, mRNA processing factor, transcript variant X1	MSTRG.19536.1	ncbi_101119508	0.685065	TMEM132C	transmembrane protein 132C
MSTRG.15931.1	ncbi_101115537	0.966152	Pip5k1c	1.96825e-14	phosphatidylinositol-4-phosphate 5-kinase type 1 gamma, transcript variant X1	MSTRG.6107.6	ncbi_101121669	0.666439	Hoxc5	homeobox C5	MSTRG.14327.5	ncbi_100302359	0.673208	TXNDC17	thioredoxin domain containing 17
MSTRG.15931.1	ncbi_101114771	0.965616	ELMO1	2.33426e-14	engulfment and cell motility 1, transcript variant X6	MSTRG.17107.1	ncbi_114117888	0.650714	CH2	androgen-binding protein homolog	MSTRG.23791.1	ncbi_101106481	0.648805	Epb41l3	erythrocyte membrane protein band 4.1 like 3, transcript variant X1
MSTRG.22048.1	ncbi_101119941	0.965188	Hist1h2bc	2.66853e-14	histone H2B type 1	MSTRG.22048.1	ncbi_101123670	0.567509	HIST1H4A	histone H4	MSTRG.23001.1	ncbi_114110090	0.630462	--	probable serine/threonine-protein kinase samkC
MSTRG.1616.1	ncbi_100526785	0.964962	KRT40	2.86311e-14	keratin 40	MSTRG.20722.1	ncbi_101104691	0.41074	PLD4	phospholipase D family member 4, transcript variant X1	MSTRG.13820.1	ncbi_101112657	0.586627	--	keratin, high-sulfur matrix protein, IIIA3
MSTRG.22048.1	ncbi_101123158	0.964846	Hist1h1b	2.96754e-14	histone H1.5	MSTRG.20722.2	ncbi_101104691	0.41074	PLD4	phospholipase D family member 4, transcript variant X1	MSTRG.20722.1	ncbi_105603281	0.448378	AHNAK2	AHNAK nucleoprotein 2
MSTRG.22035.1	ncbi_101102344	0.964409	HIST1H2AG	3.39229e-14	histone H2A type 1	XR_003586258.1	MSTRG.21890	0.286952	H2-Q10	LOW QUALITY PROTEIN: BOLA class I histocompatibility antigen, alpha chain BL3-6 [Ovis aries]	MSTRG.20722.2	ncbi_105603281	0.448378	AHNAK2	AHNAK nucleoprotein 2
MSTRG.22035.1	ncbi_114109701	0.963874	H3110	3.98737e-14	histone H3.1, transcript variant X2	MSTRG.13836.1	ncbi_101106346	-0.537226	KRT10	keratin 10, transcript variant X1	XR_003586258.1	ncbi_114109642	0.419125	HLA-A	BOLA class I histocompatibility antigen, alpha chain BL3-7-like
MSTRG.1616.1	ncbi_114116970	0.963441	--	4.53664e-14	keratin-associated protein 17-1
MSTRG.1825.4	ncbi_101116796	0.962929	ZBTB20	5.27312e-14	zinc finger and BTB domain containing 20, transcript variant X12
MSTRG.13824.1	ncbi_100294614	0.962917	Krt33a	5.29207e-14	keratin 33
MSTRG.21051.1	ncbi_101110423	0.962843	Dock9	5.40777e-14	dedicator of cytokinesis 9, transcript variant X1
MSTRG.22035.1	ncbi_101123417	0.962351	HIST1H2AD	6.23534e-14	histone H2A type 1-D
MSTRG.13826.1	ncbi_100294612	0.962061	Krtap9-3	6.77444e-14	keratin associated protein 1-1
MSTRG.13824.1	ncbi_443080	0.962008	KRT28	6.87894e-14	keratin 28
MSTRG.49.1	ncbi_101122913	0.961981	CITED4	6.93152e-14	Cbp/p300 interacting transactivator with Glu/Asp rich carboxy-terminal domain 4
MSTRG.22035.1	ncbi_101106041	0.961958	HIST1H2BK	6.97713e-14	histone H2B type 1-K
MSTRG.13826.1	ncbi_443550	0.961944	KRTAP3-3	7.00584e-14	high-sulfur keratin BIIIB4 protein
MSTRG.15931.1	ncbi_101117767	0.961739	TEP1	7.42478e-14	telomerase associated protein 1, transcript variant X1
MSTRG.1616.1	ncbi_443414	0.961557	--	7.81556e-14	KAP5.4 keratin protein
MSTRG.22035.1	ncbi_101104790	0.96144	HIST1H2AB	8.07741e-14	histone H2A type 1-B/E
MSTRG.7995.1	ncbi_101110224	0.961401	TNS2	8.16515e-14	tensin 2, transcript variant X5
MSTRG.49.1	ncbi_100526784	0.961003	KRT83	9.12329e-14	keratin 81
MSTRG.13824.1	ncbi_101115868	0.960861	Gmcl1	9.49062e-14	germ cell-less 1, spermatogenesis associated
MSTRG.13836.1	ncbi_101119019	0.960723	SLC39A10	9.85913e-14	solute carrier family 39 member 10, transcript variant X2
MSTRG.21050.1	ncbi_101114044	0.96037	RIPOR1	1.08592e-13	RHO family interacting cell polarization regulator 1, transcript variant X1
MSTRG.22035.1	ncbi_105603814	0.960369	H3110	1.08637e-13	histone H3.1
MSTRG.13836.1	ncbi_101104562	0.95987	FOXE1	1.24371e-13	forkhead box E1
MSTRG.12250.4	ncbi_101107464	0.959697	FHOD1	1.30296e-13	formin homology 2 domain containing 1
MSTRG.15931.1	ncbi_101113020	0.959671	DST	1.31189e-13	dystonin
MSTRG.21051.1	ncbi_101122941	0.959624	ABL1	1.32873e-13	ABL proto-oncogene 1, non-receptor tyrosine kinase, transcript variant X1
MSTRG.13836.1	ncbi_443079	0.959565	KRT25	1.34974e-13	keratin 25
MSTRG.22035.1	ncbi_101118999	0.959546	HIST1H2BN	1.3566e-13	histone H2B type 1-N
MSTRG.22048.1	ncbi_101104790	0.959444	HIST1H2AB	1.39402e-13	histone H2A type 1-B/E
MSTRG.7995.1	ncbi_101110423	0.959305	Dock9	1.44653e-13	dedicator of cytokinesis 9, transcript variant X1
MSTRG.15931.1	ncbi_101119493	0.959197	SVIL	1.48858e-13	supervillin, transcript variant X1
MSTRG.22048.1	ncbi_114109701	0.958871	H3110	1.62223e-13	histone H3.1, transcript variant X2
MSTRG.23001.1	ncbi_101110219	0.958834	KRT72	1.63808e-13	keratin, type II cytoskeletal 72
MSTRG.22048.1	ncbi_101112606	0.958581	HIST1H4A	1.75059e-13	histone H4
MSTRG.13826.1	ncbi_106991399	0.95847	--	1.80176e-13	keratin, high-sulfur matrix protein, IIIA3-like
MSTRG.22447.1	ncbi_101114771	0.958442	ELMO1	1.81486e-13	engulfment and cell motility 1, transcript variant X6
MSTRG.12818.1	ncbi_443080	0.957957	KRT28	2.05731e-13	keratin 28
MSTRG.12818.1	ncbi_101119019	0.957905	SLC39A10	2.08492e-13	solute carrier family 39 member 10, transcript variant X2
MSTRG.22048.1	ncbi_101123417	0.957494	HIST1H2AD	2.31549e-13	histone H2A type 1-D
MSTRG.49.1	ncbi_100141295	0.957476	KRT85	2.32631e-13	keratin, type II microfibrillar, component 5-like
MSTRG.6107.6	MSTRG.2865	0.957441	CFDP2	2.34692e-13	endonuclease-reverse transcriptase [Babesia ovata]
MSTRG.22447.1	ncbi_101116796	0.957228	ZBTB20	2.47695e-13	zinc finger and BTB domain containing 20, transcript variant X12
MSTRG.22035.1	ncbi_114109686	0.956765	H3110	2.78276e-13	histone H3.1
MSTRG.22048.1	ncbi_101106041	0.956741	HIST1H2BK	2.79914e-13	histone H2B type 1-K
MSTRG.1616.1	ncbi_100294613	0.956719	KRTAP1-5	2.81482e-13	keratin associated protein 1-3
MSTRG.25305.1	ncbi_101121145	0.956587	CXCL12	2.90915e-13	C-X-C motif chemokine ligand 12, transcript variant X2
MSTRG.15931.1	ncbi_101103492	0.956582	SCARF1	2.91214e-13	scavenger receptor class F member 1
MSTRG.22035.1	ncbi_101120961	0.956326	H3110	3.10306e-13	uncharacterized LOC101120961
MSTRG.49.1	ncbi_101106046	0.955798	KRTAP13-2	3.53315e-13	keratin-associated protein 13-1-like
MSTRG.15931.1	ncbi_101110224	0.955757	TNS2	3.56842e-13	tensin 2, transcript variant X5
MSTRG.21051.1	ncbi_100135687	0.955691	HIF3A	3.62643e-13	hypoxia inducible factor 3 subunit alpha, transcript variant X1
MSTRG.15931.1	ncbi_101105413	0.955205	CORO2B	4.07972e-13	coronin 2B
MSTRG.13836.1	ncbi_101119941	0.95517	Hist1h2bc	4.11424e-13	histone H2B type 1
MSTRG.13836.1	ncbi_114109701	0.955112	H3110	4.17238e-13	histone H3.1, transcript variant X2
XR_003586824.1	ncbi_101121154	0.954734	MECP2	4.56705e-13	methyl-CpG binding protein 2, transcript variant X1
MSTRG.1595.1	ncbi_101103772	0.954722	KRTAP11-1	4.57979e-13	keratin-associated protein 11-1
MSTRG.13826.1	ncbi_101113159	0.954432	Krtap9-3	4.90647e-13	keratin, high-sulfur matrix protein, B2D
MSTRG.15931.1	ncbi_101121946	0.954229	ADAP2	5.14773e-13	ArfGAP with dual PH domains 2, transcript variant X1
MSTRG.12409.1	ncbi_101117111	0.954159	AKAP6	5.23318e-13	A-kinase anchoring protein 6, transcript variant X1
MSTRG.12250.4	ncbi_101113692	0.954124	Asx	5.27605e-13	ASXL transcriptional regulator 1, transcript variant X1
MSTRG.22029.1	ncbi_106991790	0.95392	H3110	5.53551e-13	uncharacterized LOC106991790
MSTRG.15931.1	ncbi_101102951	0.953872	PTPRM	5.59735e-13	protein tyrosine phosphatase, receptor type M, transcript variant X1
MSTRG.22029.1	ncbi_101110185	0.953777	Hist1h2bc	5.72278e-13	histone H2B type 1
MSTRG.13824.1	ncbi_114116824	0.953572	Hist1h3b	6.00263e-13	histone H3
XR_003590695.1	MSTRG.4360	0.953372	--	6.28701e-13	uncharacterized protein LOC116280459 [Vicugna pacos]
XR_003586824.1	ncbi_101112614	0.952993	KCNN3	6.86161e-13	potassium calcium-activated channel subfamily N member 3, transcript variant X1
MSTRG.13237.1	MSTRG.13236	0.952877	--	7.04597e-13	reverse transcriptase-like [Bos taurus]
MSTRG.13824.1	ncbi_101109919	0.952866	HIST1H4A	7.06353e-13	histone H4
MSTRG.23796.1	ncbi_101117767	0.952637	TEP1	7.44241e-13	telomerase associated protein 1, transcript variant X1
MSTRG.12250.4	ncbi_101102760	0.952619	MLXIP	7.47341e-13	MLX interacting protein, transcript variant X1
MSTRG.22048.1	ncbi_105603814	0.952572	H3110	7.55261e-13	histone H3.1
MSTRG.21050.1	ncbi_101113692	0.952262	Asx	8.10225e-13	ASXL transcriptional regulator 1, transcript variant X1
MSTRG.13836.1	ncbi_101118640	0.952064	ARL15	8.47215e-13	ADP ribosylation factor like GTPase 15
MSTRG.49.1	ncbi_443487	0.951982	Krt31	8.62971e-13	type I wool keratin intermediate filament 8c1
MSTRG.49.1	ncbi_101122572	0.951941	SLC20A2	8.70997e-13	solute carrier family 20 member 2, transcript variant X4
MSTRG.10301.1	ncbi_101116796	0.95189	ZBTB20	8.80961e-13	zinc finger and BTB domain containing 20, transcript variant X12
MSTRG.13826.1	ncbi_100294614	0.951714	Krt33a	9.16204e-13	keratin 33
MSTRG.7842.1	ncbi_101108896	0.951678	MREG	9.23664e-13	melanoregulin
MSTRG.11626.2	ncbi_101114771	0.95141	ELMO1	9.80316e-13	engulfment and cell motility 1, transcript variant X6
MSTRG.12818.1	ncbi_101117208	0.951299	GPR87	1.00483e-12	G protein-coupled receptor 87
MSTRG.23796.1	ncbi_101119493	0.951155	SVIL	1.03732e-12	supervillin, transcript variant X1
MSTRG.22048.1	ncbi_101120200	0.951116	HIST1H2AG	1.04627e-12	histone H2A type 1, transcript variant X1
MSTRG.15931.1	ncbi_101121620	0.950911	SOGA1	1.09444e-12	suppressor of glucose, autophagy associated 1, transcript variant X1
MSTRG.13824.1	ncbi_101119019	0.950637	SLC39A10	1.16214e-12	solute carrier family 39 member 10, transcript variant X2
MSTRG.15931.1	ncbi_101114044	0.950596	RIPOR1	1.17257e-12	RHO family interacting cell polarization regulator 1, transcript variant X1
MSTRG.9481.8	ncbi_101117042	0.950529	Hip1	1.18962e-12	huntingtin interacting protein 1
MSTRG.49.1	ncbi_101108645	0.950502	HOXC13	1.19665e-12	homeobox C13
MSTRG.22035.1	ncbi_101112606	0.950486	HIST1H4A	1.20096e-12	histone H4
MSTRG.22035.1	ncbi_101110457	0.950302	Hist1h2bc	1.24983e-12	histone H2B type 1
MSTRG.21051.1	ncbi_114115898	0.950116	--	1.30107e-12	translation initiation factor IF-2-like
MSTRG.22035.1	ncbi_101120200	0.950011	HIST1H2AG	1.33103e-12	histone H2A type 1, transcript variant X1
MSTRG.23796.1	ncbi_101114978	0.950006	HECTD4	1.33232e-12	HECT domain E3 ubiquitin protein ligase 4, transcript variant X1
